# Supplementary material for: Developmental epigenetic programming by Tet1/3 determines peripheral CD8 T cell fate
Source: Springer Nature journal article supplement (doi:10.1038/s44319-025-00439-z), 2025-04-02
Supplement: MOESM13 [file 44319_2025_439_MOESM13_ESM.pdf]

## Expanded View Figures

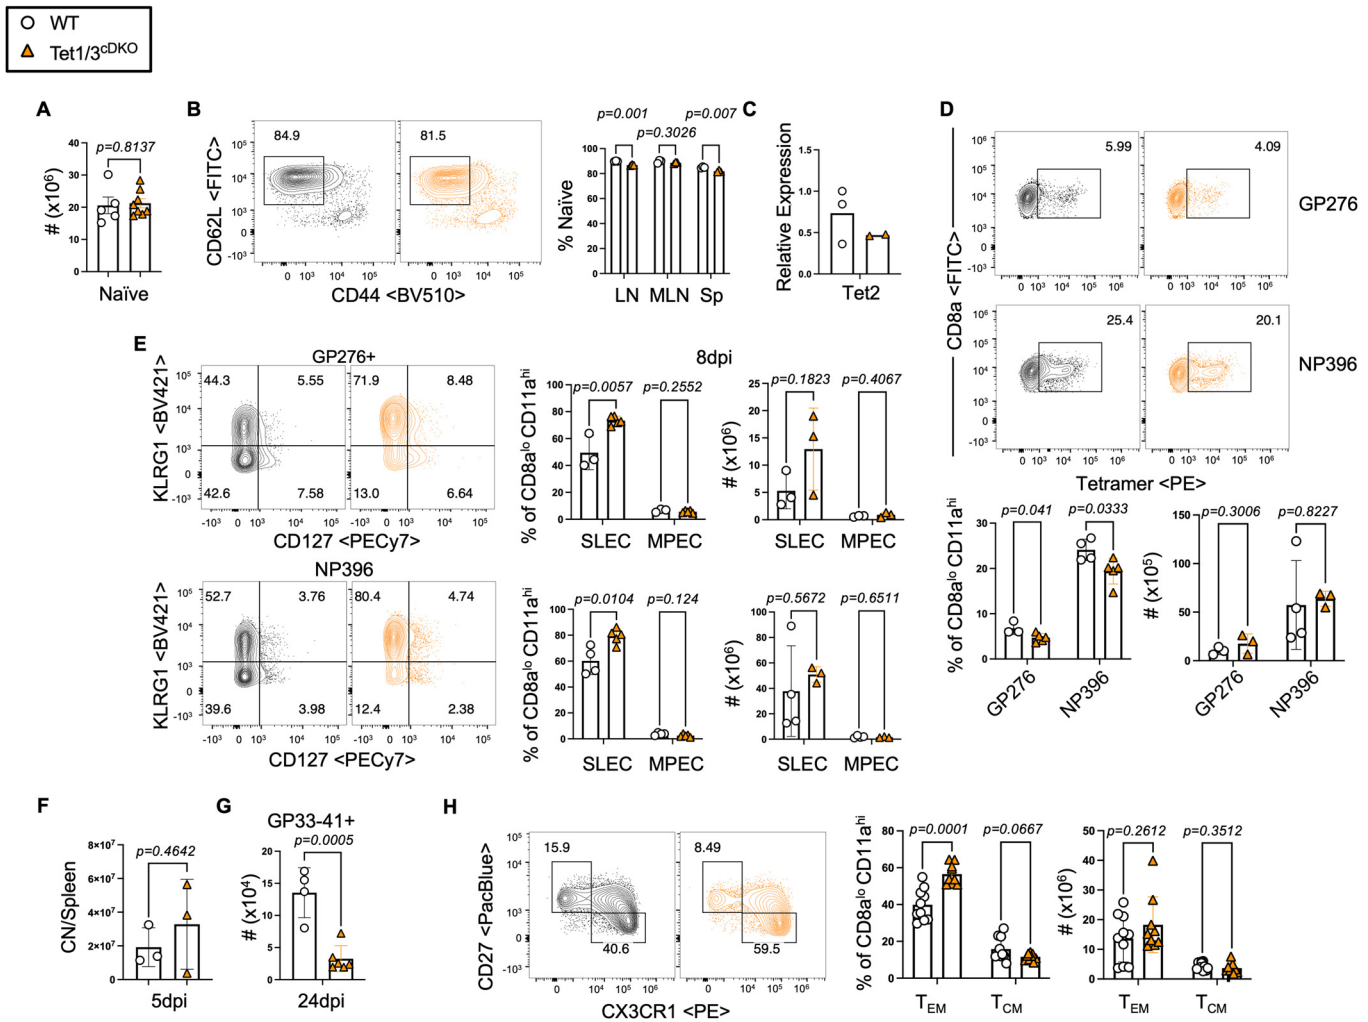

**Figure EV1. Tet1 and Tet3 deficiency results in increased SLECs and effector memory T-cell differentiation during acute LCMV infection.**

(A) Absolute numbers of mature CD8<sup>+</sup> T cells from control Tet1/3fl/fl and Rorc(t)CreTgTet1/3fl/fl mice. (WT = 5, Tet1/3<sup>cDKO</sup> = 8 biological replicates). Data are mean ± SEM, unpaired *t* test. (B) Representative FACS plots of CD62L and CD44 expression on CD8<sup>+</sup> T cells and frequency of naïve CD8<sup>+</sup> T cells from indicated secondary lymphoid organs of control P14 Tet1/3fl/fl and P14-Rorc(t)CreTgTet1/3fl/fl mice, pregated on LiveTCRb<sup>+</sup>CD8a<sup>+</sup> cells. (WT = 3, Tet1/3<sup>cDKO</sup> = 3 biological replicates). Data are mean ± SEM, multiple unpaired *t* tests. (C) Relative expression of Tet2 normalized to HPRT in naïve Tet1/3fl/fl and Rorc(t)CreTgTet1/3fl/fl CD8<sup>+</sup> T cells. (WT = 3, Tet1/3<sup>cDKO</sup> = 2 biological replicates). (D) Representative FACS plots and quantification of frequency and number of GP276<sup>+</sup> and NP396<sup>+</sup> tetramer<sup>+</sup> CD8<sup>+</sup> T cells. (WT = 3-4, Tet1/3<sup>cDKO</sup> = 5 biological replicates) Data are mean ± SEM, multiple unpaired *t* tests. (E) Representative FACS plots and quantification of frequency and number of SLEC and MPECs among GP276-tetramer<sup>+</sup> and NP396-tetramer<sup>+</sup> CD8<sup>+</sup> T cells. (WT = 3-4, Tet1/3<sup>cDKO</sup> = 5 biological replicates) Data are mean ± SEM, multiple unpaired *t* tests. (F) RT-qPCR assessment of LCMV copy number (CN) per spleen 5dpi. (WT = 3, Tet1/3<sup>cDKO</sup> = 3 biological replicates) Data are mean ± SEM, unpaired *t* test. (G) Absolute number of GP33-tetramer<sup>+</sup> CD8<sup>+</sup> T cells 24dpi. (WT = 4, Tet1/3<sup>cDKO</sup> = 6 biological replicates). Data are mean ± SEM, unpaired *t* test. (H) Representative FACS and quantification of frequency and number of TEM/TCM 8dpi. (WT = 10, Tet1/3<sup>cDKO</sup> = 9 biological replicates). Data are mean ± SEM, multiple unpaired *t* tests. Data information: *P* values are indicated in the figures and *P* < 0.05 was considered significant; paired male or female mice were used and no gender biases associated with genotypes were observed. (A, B, H) Experiments were replicated at least three times. Source data are available online for this figure.

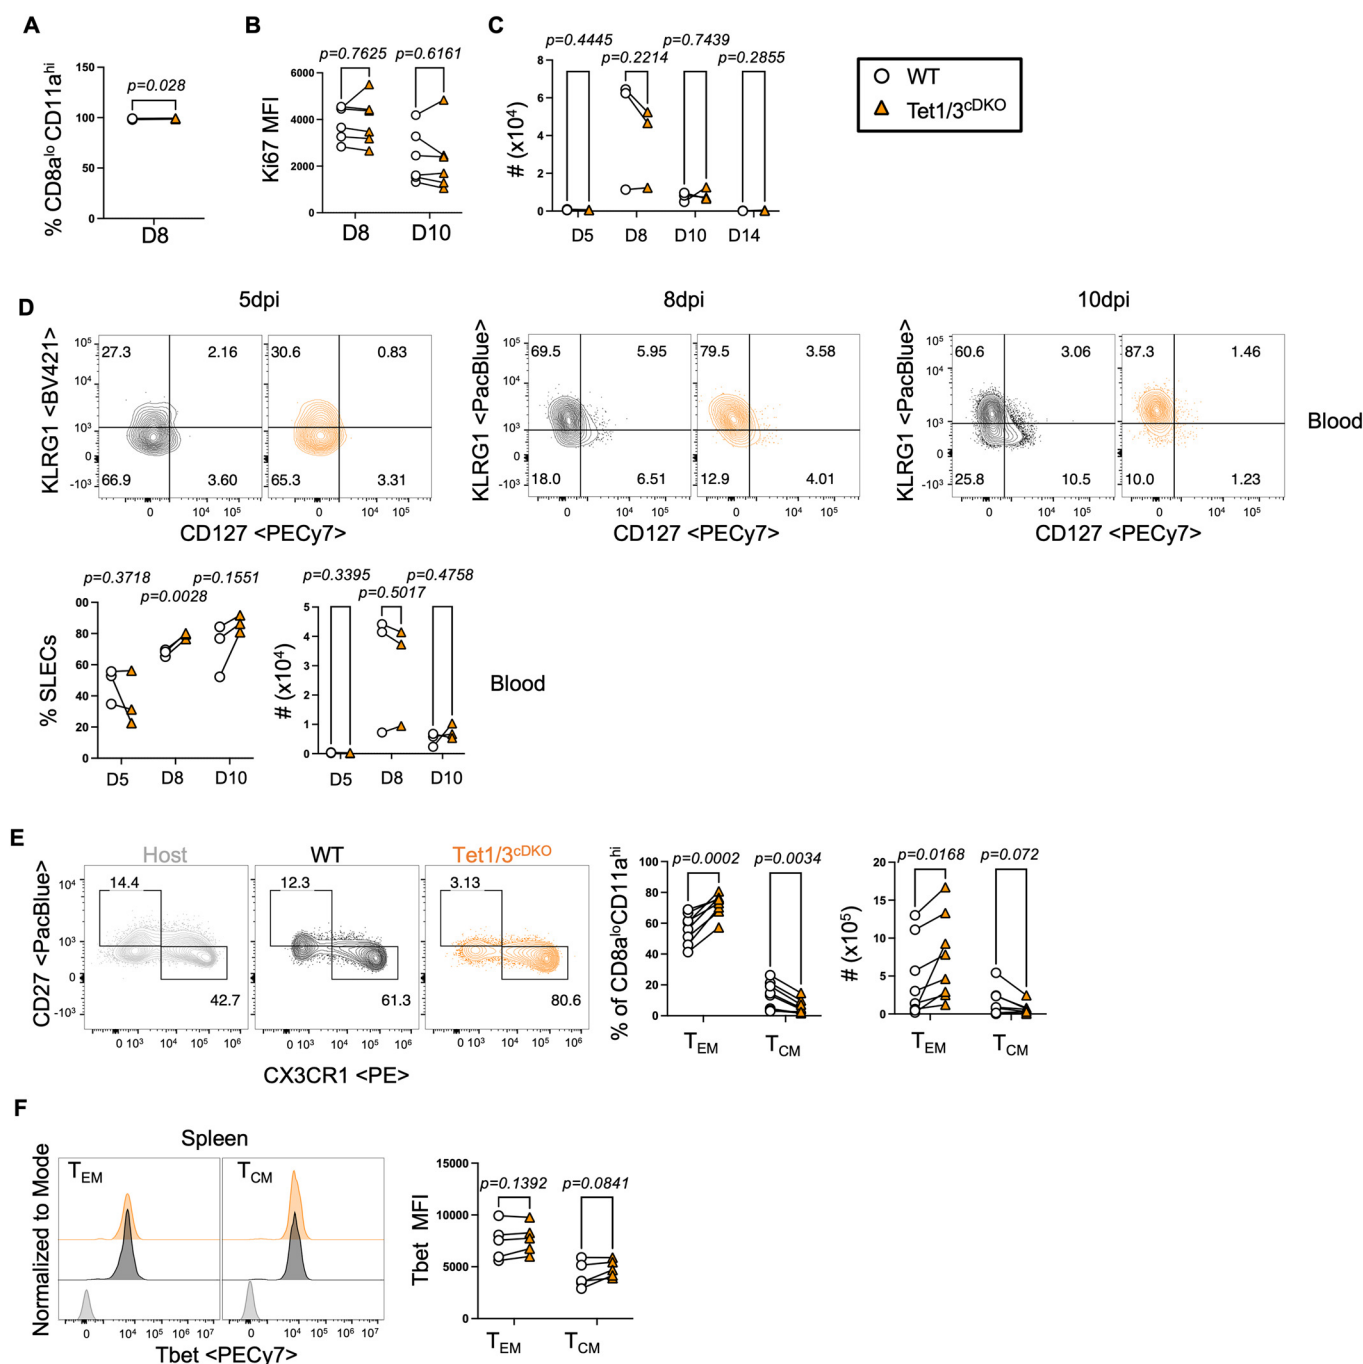

**Figure EV2. Tet1/3 restrain the differentiation of SLECs and effector memory T cells in a cell-intrinsic manner.**

(A) Percent of CD8a<sup>lo</sup>CD11a<sup>hi</sup> cells among transferred P14 CD8 T cells 8 dpi. (WT = 5, Tet1/3<sup>cDKO</sup> = 5 biological replicates) Significance was determined by paired *t* test. (B) Ki67 MFI among transferred P14 CD8 T cells in the blood at 8 and 10 dpi. (WT = 5, Tet1/3<sup>cDKO</sup> = 5 biological replicates) Significance was determined by multiple paired *t* tests. (C) Absolute numbers of transferred P14 CD8 T cells in the blood at indicated time points. (WT = 3, Tet1/3<sup>cDKO</sup> = 3 biological replicates) Significance was determined by multiple paired *t* tests. (D) Representative FACS plots and quantification of frequency and number of SLECs recovered at indicated time points in the blood. (WT = 3, Tet1/3<sup>cDKO</sup> = 3 biological replicates) Significance was determined by multiple paired *t* tests. (E) Representative FACS plots and quantification of frequency and number of TEM/TCM cells recovered 8 dpi. (WT = 8, Tet1/3<sup>cDKO</sup> = 8 biological replicates) Significance was determined by multiple paired *t* tests. (F) Representative histograms and quantification of Tbet expression in TEM/TCM populations. (WT = 5, Tet1/3<sup>cDKO</sup> = 5 biological replicates) Significance was determined by multiple paired *t* tests. Data information: *P* values are indicated in the figures and *P* < 0.05 was considered significant; paired male or female mice were used and no gender biases associated with genotypes were observed. (A–D) Experiments were replicated at least three times. Source data are available online for this figure.

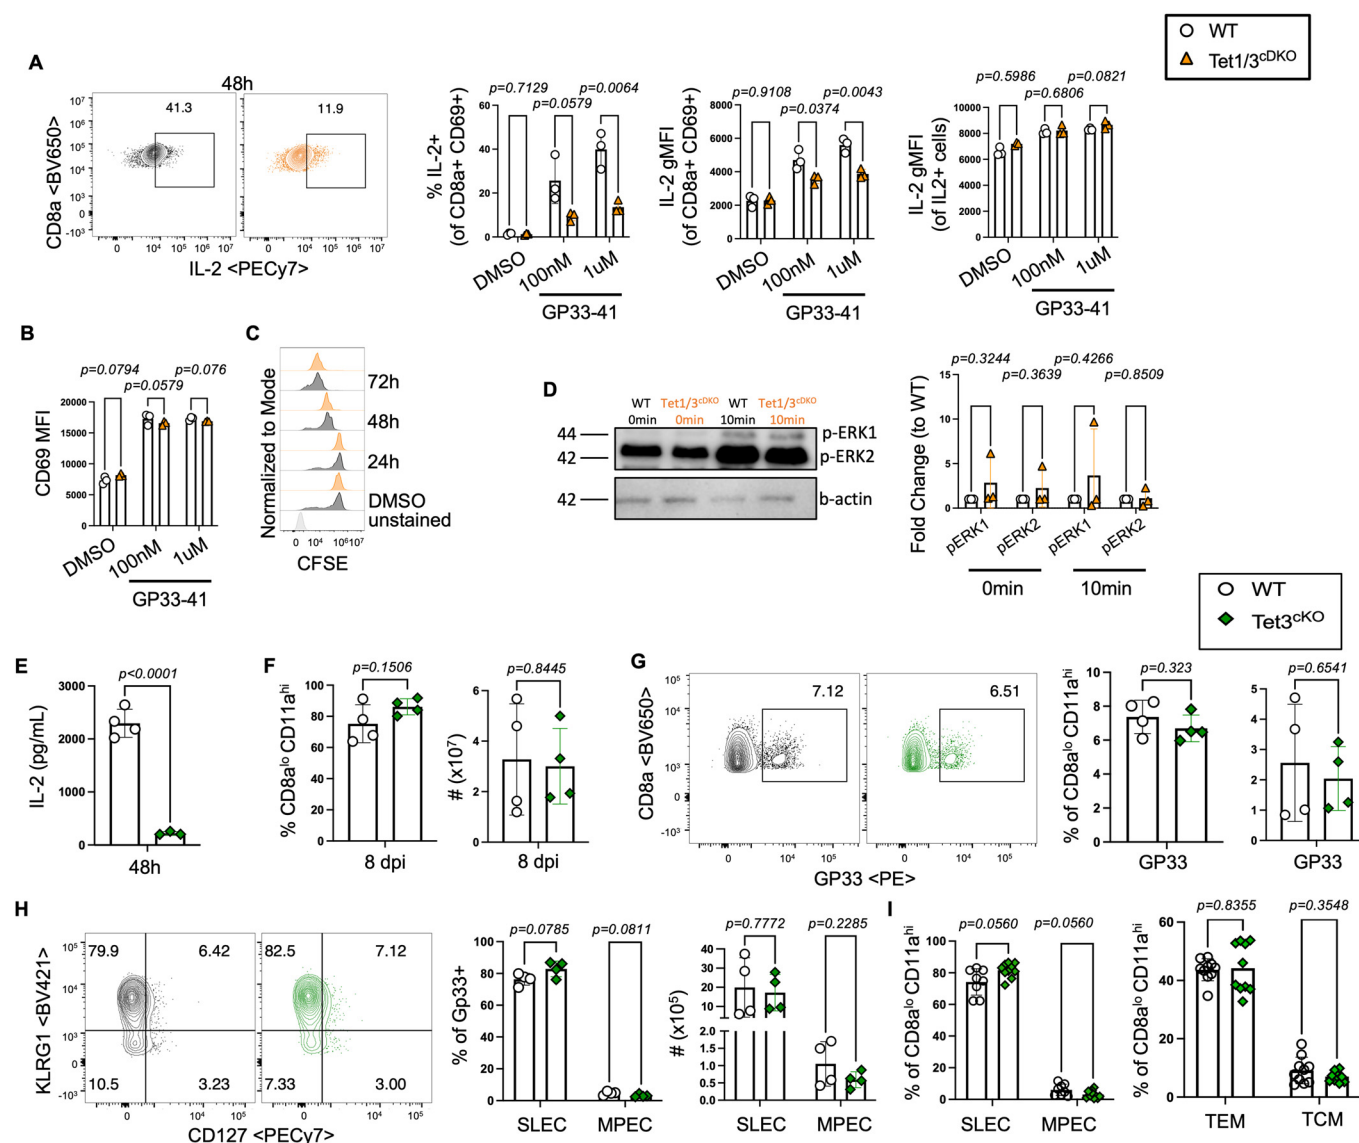

**Figure EV3. Tet1/3 restrict SLEC/T<sub>EM</sub> CD8 T-cell differentiation by controlling TCR-dependent epigenetic circuits.**

(A–C) Naive P14 WT and Tet1/3<sup>cdKO</sup> splenocytes were stimulated in vitro with gp33-41 peptide and anti-CD28 for indicated time points. (D) FACS-Sorted naive WT and Tet1/3<sup>cdKO</sup> T cells were stimulated in vitro via anti-CD3 and anti-CD28 for indicated time points. (A) Representative FACS plots and quantification of frequency of IL-2+ cells among CD69+ cells, gMFI of IL-2 among CD69+ cells, gMFI of IL-2 among IL-2+ cells, 48-h post activation. Cells were treated with Brefeldin A and Monensin for the last 5 h of stimulation (WT = 3, Tet1/3<sup>cdKO</sup> = 3 biological replicates). Data are mean ± SEM, multiple unpaired *t* test. (B) CD69 MFI on CD8a<sup>lo</sup> T cells 48-h post activation (WT = 3, Tet1/3<sup>cdKO</sup> = 3 biological replicates). Data are mean ± SEM, multiple unpaired *t* test. (C) Representative histogram showing CD8 T-cell proliferation by CFSE dilution. (D) Representative immunoblot and quantification of phospho-ERK1/2. Blots were quantified using ImageJ and normalized to show quantification of three independent experiments. Data are mean ± SEM, multiple unpaired *t* tests. (E) Quantification of IL-2 levels in the supernatants of activated CD8 T cells by ELISA. (WT = 4, Tet3<sup>cdKO</sup> = 4 biological replicates) Data are mean ± SEM, unpaired *t* test. (F) Percentage and number of antigen-experienced CD8 T cells 48-h post activation (WT = 4, Tet3<sup>cdKO</sup> = 4 biological replicates) Data are mean ± SEM, unpaired *t* test. (G) Representative FACS plots and quantification of frequency and number of GP33-tetramer+ CD8 T cells. Cells were pregated on LiveTCRβ<sup>+</sup>CD8a<sup>lo</sup>CD11a<sup>hi</sup> cells. (WT = 4, Tet3<sup>cdKO</sup> = 4 biological replicates) Data are mean ± SEM, unpaired *t* test. (H) Representative FACS plots and quantification of frequency and number of SLECs/MPECs among GP33-tetramer+ cells 8 dpi. (WT = 4, Tet3<sup>cdKO</sup> = 4 biological replicates) Data are mean ± SEM, multiple unpaired *t* tests. (I) Quantification of frequency of SLECs/MPECs among activated CD8 T cells 8 dpi. Data is a summary of 2 independent experiments (WT = 8, Tet3<sup>cdKO</sup> = 10 biological replicates) Data are mean ± SEM, multiple unpaired *t* tests. Data information: *P* values are indicated in the figures and *P* < 0.05 was considered significant; paired male or female mice were used and no gender biases associated with genotypes were observed. (A) Experiments were replicated three times. (B–D) Experiments were replicated twice. Source data are available online for this figure.

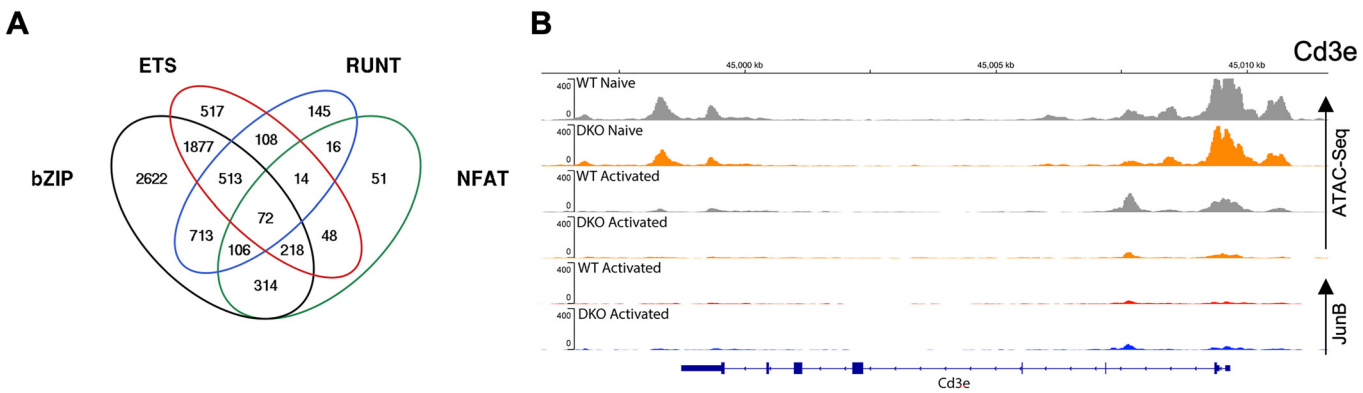

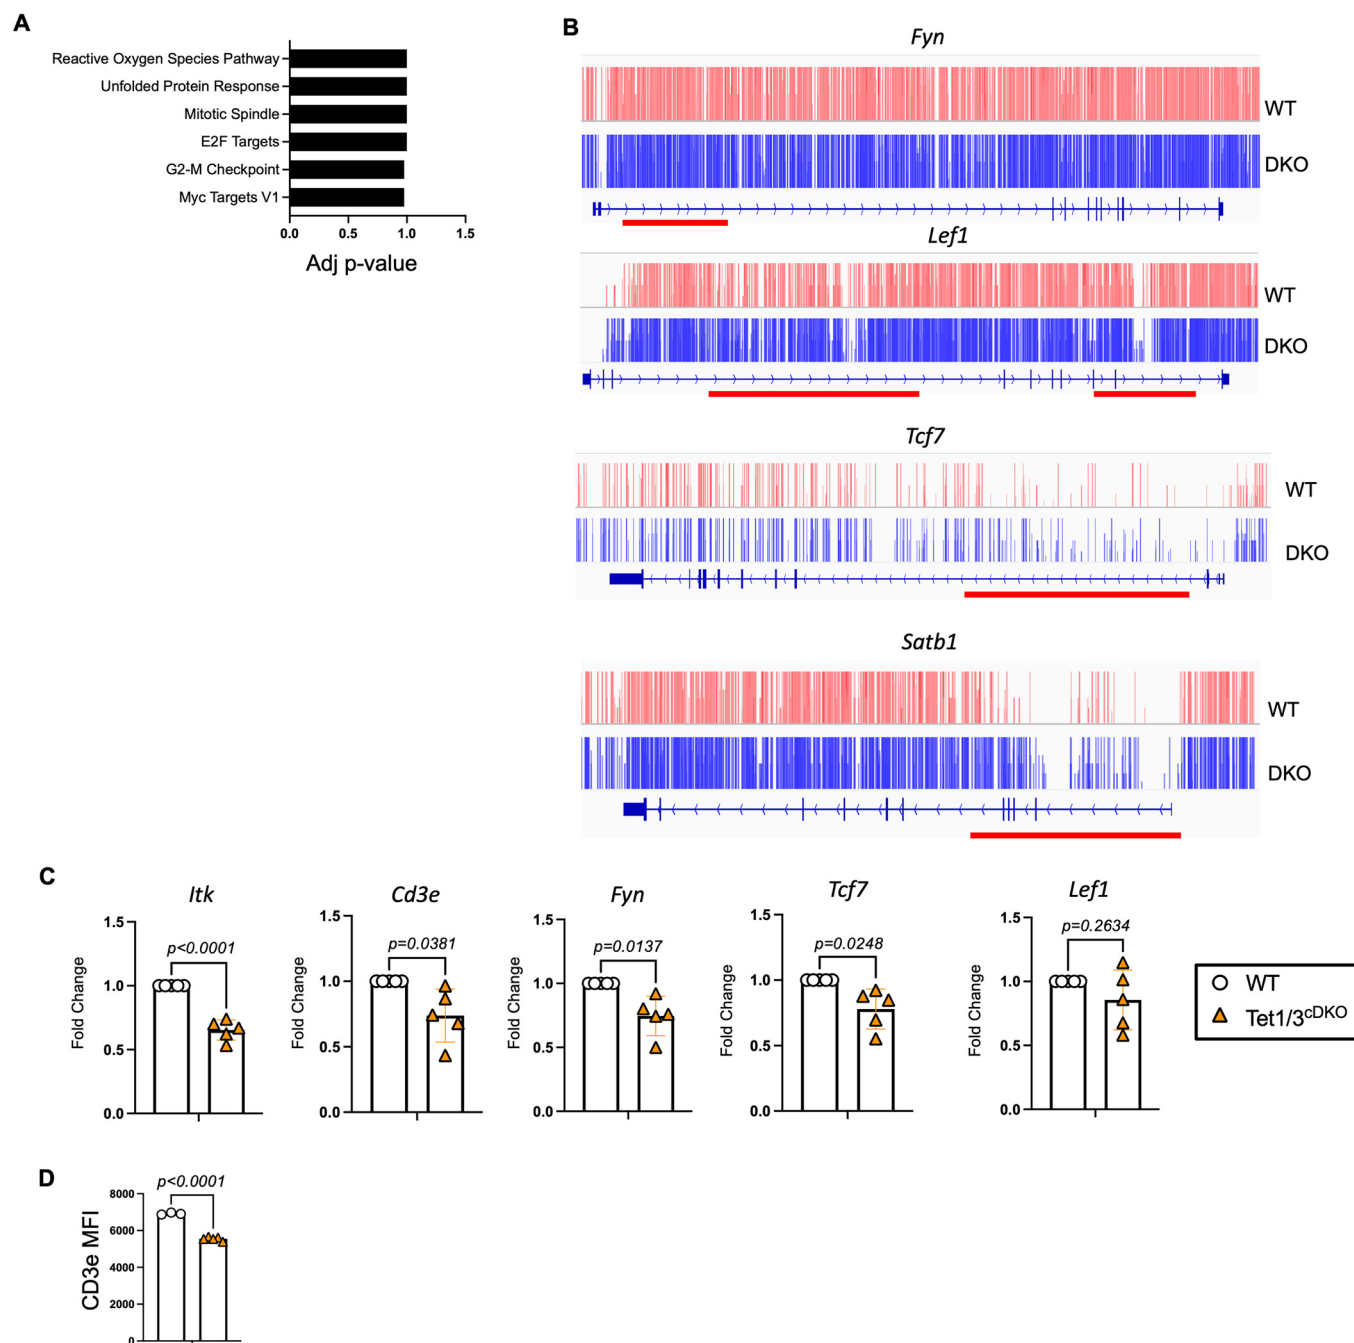

**Figure EV5. CD8 T cells undergo Tet/3-dependent DNA demethylation during thymic development.**

(A) Gene enrichment analysis of differentially methylated gene loci between WT activated and naive CD8 T cells. Adjusted  $P$  value was calculated using the Benjamini-Hochberg method. (B) Integrated genome browser view (IGV) shots of the *Fyn*, *Lef1*, *Tcf7* and *Satb1* gene loci. Tracks show the reference gene, and EM-Seq methylation peaks (WT in red and Tet1/3<sup>cdKO</sup> in blue) in activated CD8 T cells. Red bar indicates regions with differentially methylated CpGs. (C) Fold change of *Itk*, *Cd3e*, *Fyn*, *Tcf7* and *Lef1* expression in activated CD8 T cells by RT-qPCR. Data is normalized to HPRT. (WT = 5, Tet1/3<sup>cdKO</sup> = 5 biological replicates). Cells were activated in vitro for 48 h with anti-CD3/CD28. Data are mean  $\pm$  SEM, unpaired  $t$  test. (D) CD3e MFI 48 h post activation with anti-CD3/CD28. (WT = 3, Tet1/3<sup>cdKO</sup> = 5 biological replicates). Data are mean  $\pm$  SEM, unpaired  $t$  test. Data information:  $P$  values are indicated in the figures and  $P < 0.05$  was considered significant; paired male or female mice were used and no gender biases associated with genotypes were observed. (A) Experiments were replicated three times. (C, D) Experiments were replicated at least three times. Source data are available online for this figure.

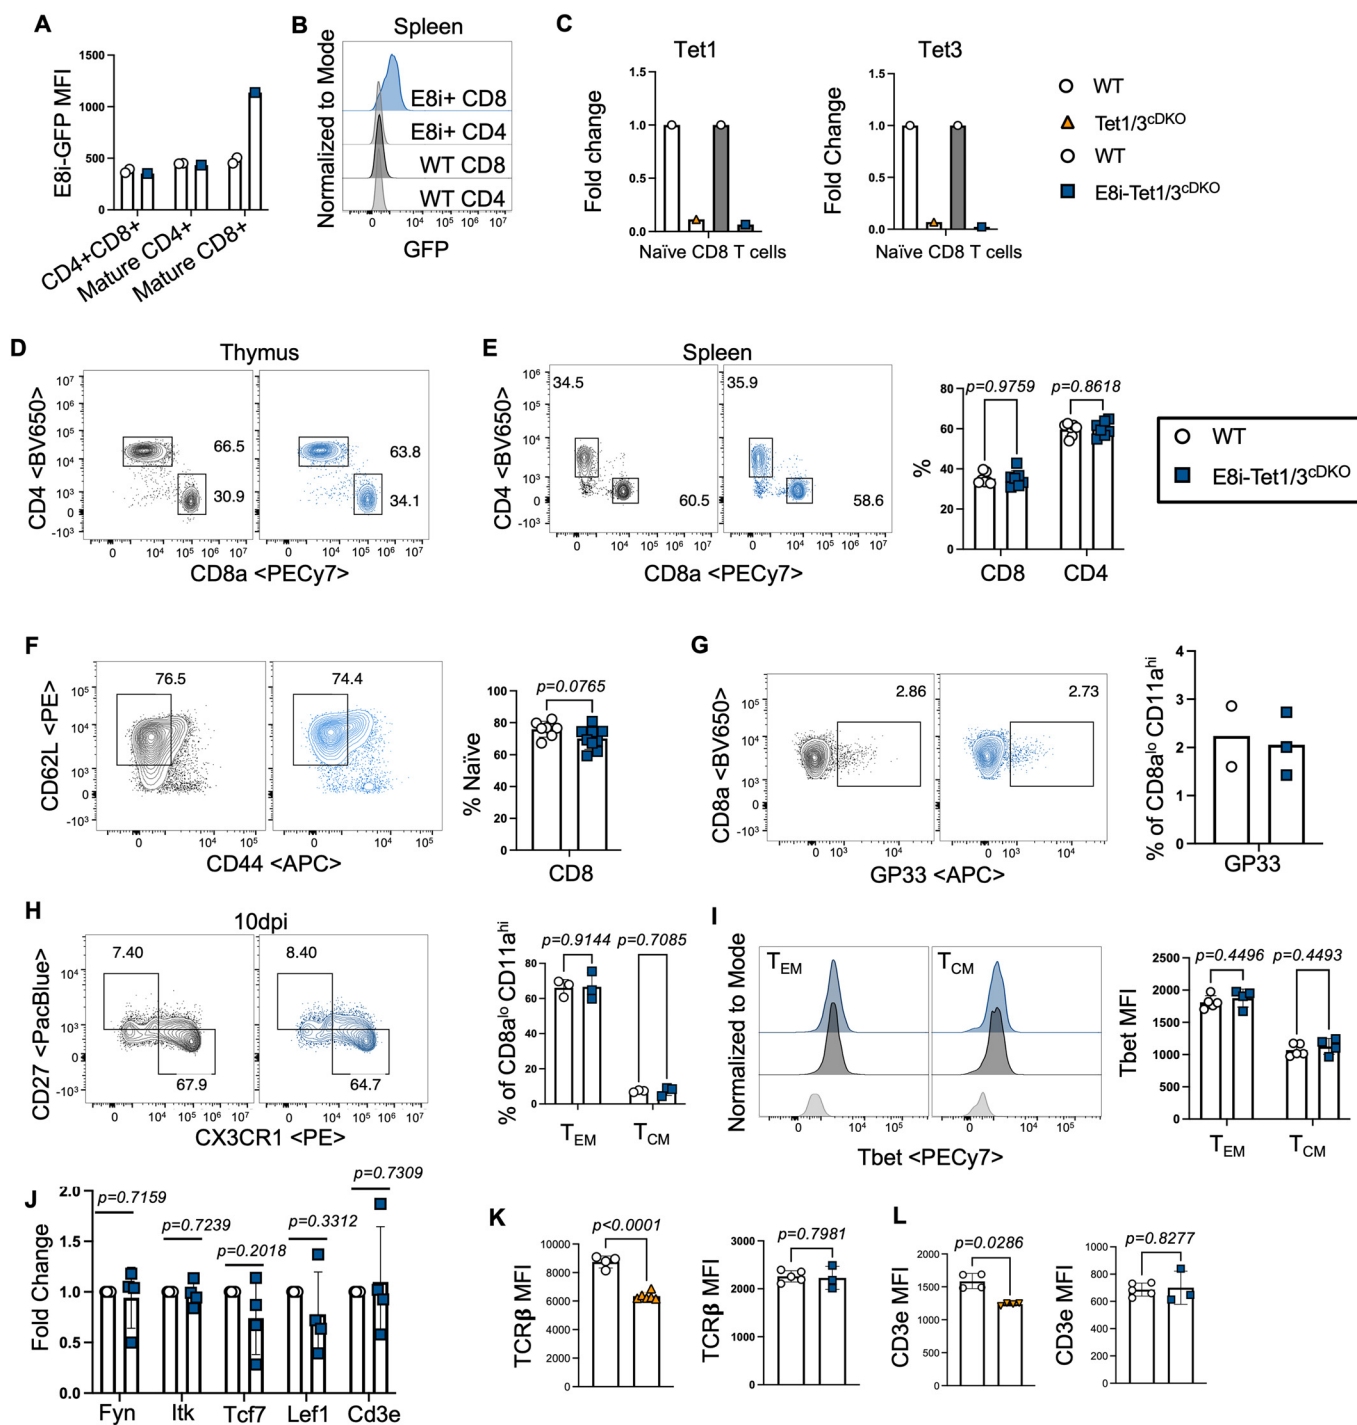



◀ **Figure EV6. Tet1/3 are dispensable in peripheral CD8 T cells for effector and memory differentiation.**

(A) GFP MFI expressed in control Tet1/3fl/fl and E8iCreTgTet1/3fl/fl thymic populations. (WT = 2, Tet1/3<sup>cDKO</sup> = 2 biological replicates). (B) Representative histograms showing GFP expression in control Tet1/3fl/fl- and E8iCreTgTet1/3fl/fl lymphocytes from the spleen (C) Fold change of Tet1 and Tet3 genomic copies in naive CD8 T cells from control Tet1/3fl/fl, Rorc(t)CreTgTet1/3fl/fl and E8iCreTgTet1/3fl/fl mice. (D) Representative FACS plots of CD4 and CD8 thymic T-cell populations from control Tet1/3fl/fl and E8iCreTgTet1/3fl/fl mice. Cells were pregated on LiveCD24-TCRb+CD69- cells. (E) Representative FACS plots and frequency of peripheral CD4 and CD8 splenic T-cell populations from control Tet1/3fl/fl and E8iCreTgTet1/3fl/fl mice. Cells were pregated on LiveTCRb+ cells. (WT = 7, Tet1/3<sup>cDKO</sup> = 7 biological replicates). Data are mean ± SEM, multiple unpaired *t* tests. (F) Representative FACS plots and frequency of naive CD8 T cells from the lymph nodes and spleens of control Tet1/3fl/fl and E8iCreTgTet1/3fl/fl mice. Cells were pregated on LiveTCRb+CD8a+ cells. (WT = 7, Tet1/3<sup>cDKO</sup> = 9 biological replicates). Data are mean ± SEM, unpaired *t* test. (G) Representative histograms and quantification of GP33-tetramer+ CD8 T cells 8 dpi. (WT = 2, Tet1/3<sup>cDKO</sup> = 3 biological replicates). (H) Representation flow plots and quantification of TEM and TCM populations in the spleen 10 dpi. (WT = 3, Tet1/3<sup>cDKO</sup> = 3 biological replicates) Data are mean ± SEM, multiple unpaired *t* tests. (I) Representative histograms and quantification of Tbet expression in TEM/TCM populations 30 dpi. (WT = 5, Tet1/3<sup>cDKO</sup> = 4 biological replicates) Data are mean ± SEM, multiple unpaired tests. (J) Fold change of Fyn, Itk, Tcf, Lef1, Cd3e mRNA expression in activated CD8 T cells from control and E8iCreTgTet1/3fl/fl mice. Data is a summary of 2 independent experiments (WT = 4, Tet1/3<sup>cDKO</sup> = 4 biological replicates) Data are mean ± SEM, multiple unpaired *t* tests. (K) TCRb MFI on bulk CD8 + T cells from the spleen 8 dpi with LCMV-Armstrong. Data are mean ± SEM, unpaired *t* test. (WT = 4, RorcCreTet1/3<sup>cDKO</sup> = 6 biological replicates; WT = 5, E8iCre-Tet1/3<sup>cDKO</sup> = 3 biological replicates) Data are mean ± SEM, unpaired *t* test. (L) Cd3e MFI on bulk CD8 + T cells from the spleen 10 dpi with LCMV-Armstrong. Data are mean ± SEM, unpaired *t* test. (WT = 4, RorcCreTet1/3<sup>cDKO</sup> = 4 biological replicates; WT = 5, E8iCre-Tet1/3<sup>cDKO</sup> = 3 biological replicates) Data are mean ± SEM, unpaired *t* test. Data information: *P* values are indicated in the figures and *P* < 0.05 was considered significant; paired male or female mice were used and no gender biases associated with genotypes were observed. (A, B, D-L) Experiments were replicated at least two times. Source data are available online for this figure.
